# Supplementary material for: The Potential of Essential Oils from Active Packaging to Reduce Ethylene Biosynthesis in Plant Products. Part 1: Vegetables (Broccoli and Tomato)
Source: MDPI journal article supplement (doi:10.3390/plants12193404), 2023-09-27
Supplement: s1 [file s1]

**Supplementary File S2.** Composition of the used essential oils

**Bergamot essential oil**

| Component           | Content (%) |
|---------------------|-------------|
| $\beta$ -pinene     | 5.5–9.5     |
| Limonene            | 30-45       |
| $\gamma$ -Terpinene | 6-10        |
| Linalool            | 3-15        |
| Linalyl acetate     | 22-36       |
| $\beta$ -Bisabolene | 0.30-0.55   |
| Geranial            | 0.28–0.50   |

**Grapefruit essential oil**

| Component              | Content (%) |
|------------------------|-------------|
| $\alpha$ -pinene       | 0.2 - 0.6   |
| $\beta$ -pinene        | 0.05 - 0.2  |
| Sabinene               | 0.1 - 0.6   |
| $\beta$ -myrcene 1-3   | 1.5 - 2.5   |
| Limonene               | 92 - 96     |
| Octanal                | 0.2 - 0.8   |
| Nonanal                | 0.04 - 0.1  |
| Decanal                | 0.1 - 0.6   |
| $\beta$ -caryophyllene | 0.2 - 0.5   |

**Thyme essential oil**

| Component        | Content (%) |
|------------------|-------------|
| $\alpha$ -pinene | 3-8         |

|                         |           |
|-------------------------|-----------|
| $\beta$ -myrcene        | 2-6       |
| Limonene                | 1.5 - 4   |
| 1,8-cineole + $\beta$ - | 25 - 35   |
| Camphre                 | 4 - 12    |
| $\beta$ -caryophyllene  | 1-3       |
| Neral                   | 0.5 - 3.5 |
| Geranial                | 0.5 - 2.5 |
| $\alpha$ -terpineol     | 1.5 - 3.5 |
| Borneol                 | 1.5 - 4.5 |

#### Rosemary essential oil

| Component                            | Content (%) |
|--------------------------------------|-------------|
| $\alpha$ -pinene + $\alpha$ -thuyene | 18 - 26     |
| Camphene                             | 8 - 13      |
| $\beta$ -myrcene                     | 2.5 - 5     |
| Limonene                             | 2.5 - 5.5   |
| 1-8-cineole                          | 17 - 25     |
| p-cymene                             | 1 - 2       |
| Camphre                              | 12.5 - 22   |
| Bornyl acetate                       | 0.4 - 2.5   |
| $\alpha$ -terpineol                  | 1 - 3.5     |
| Borneol                              | 2 - 4       |
